# Supplementary material for: Burkholderia contaminans Biofilm Regulating Operon and Its Distribution in Bacterial Genomes
Source: Biomed Res Int. 2016 Dec 14;2016:6560534. doi: 10.1155/2016/6560534 (PMC5192318; doi:10.1155/2016/6560534)
Supplement: Supplementary file 1 — Table S1: Characteristics of two-component transcriptional regulators (TCTR) genes in reference B. lata genome (Accession Number NC_007510.1). Table S2: Diversity of two-component transcriptional regulators' domains. [file 6560534.f1.xlsx]

## Sheet: S1 Table
Characteristics of two component transcriptional regulators (TCTR) genes in reference B. lata genome (Accession Number NC_007510.1)
Chromosome number - order number	Location	Product	gene sequence	protein sequence	Domains of the two component transcriptional regulators (TCTR)
					Receiver	DNA binding	Multi
1-1	complement(90816..91508)	two component transcriptional regulator, winged helix family	ATGCGACTCCTTCTGATTGAAGACGACCGCCCCATCGCACGCGGTATCCAGAGCAGCCTCGAGCAGGCTGGCTTCACCGTCGACATGGTGCATGACGGCATCTTTGCCGAACAGGCGCTGGCACAGAACCGCCACGAACTCGTGATCCTCGACCTCGGCCTGCCGGGCATCGACGGGATGACGCTGCTCACGCGCTTCCGCCAGACCAACCGCCACACGCCCGTCATCGTGCTGACCGCACGCGACGAGCTGAACGACCGGATCCAGGGCCTGAACTCCGGCGCCGACGACTACATGCTCAAGCCGTTCGAGCCGGCCGAGCTCGAAGCGCGCATCCGCGCGGTGATGCGCCGCAGCGGCCCGCACAGCGACATGCCGCGTCCGGAAGTGTCGCTCGGC…	MRLLLIEDDRPIARGIQSSLEQAGFTVDMVHDGIFAEQALAQNRHELVILDLGLPGIDGMTLLTRFRQTNRHTPVIVLTARDELNDRIQGLNSGADDYMLKPFEPAELEARIRAVMRRSGPHSDMPRPEVSLGGVRLSGVDRRIFNDDKPLELSPREFAVLEMLLLRHGRVVSKAQLQDHLTHFGGDLGDTAIEVYVHRVRKKLEQCRVEIVTVRGFGYLLQEIRQTASV	REC superfamily	wHTH (PF00486)	OmpR, PRK10643 (BasR), PhoB, orf27
1-2	complement(472026..472787)	two component transcriptional regulator, winged helix family	ATGCGAATCGCTCTGATCGATCCGGACGCGCGCCATGCCGCGCTCCTGAACCGCCTGCTCTTTGCGGGTGGTCATGTGTGCCACGCGTTTCCGTCCAGCACGGCGTTCTTCGAGTGGCTCGCCACCGACACCTGCGACATGCTGATCACCGGCCATTGGGCCGGCGACCAGCCGGCCGAGGAAGTCATTCCGCGCGCGCAGACCATCCTGCCCGGGCTGCCGGCCATCGCCGTGATGCAGTTGCCGCGCGAAAGCGAAATCGTGTCGTGCCTGCACGCGGGCGCCGACGATTGCCTCGTGCGCCCCGTGAGCGGGCCCGAGATGCTCGCGCGCGTCAACGCACTGAGCCGGCGCGCCGGCGTGCGCCGGCCACCCACCCGCTCGCGCGAAATGTATGGC…	MRIALIDPDARHAALLNRLLFAGGHVCHAFPSSTAFFEWLATDTCDMLITGHWAGDQPAEEVIPRAQTILPGLPAIAVMQLPRESEIVSCLHAGADDCLVRPVSGPEMLARVNALSRRAGVRRPPTRSREMYGEYAFDATHCLVRFGDAIVSLTPKEFRFAQLLFTNLSRPVSRAHILETVWARRRDMKSRTLDTHASRLRSKLQLLPERGYRLLPLYGYGYQLDRVPIEPPNSRPRHADARYAASEEIAETL	REC superfamily	wHTH (PF00486)	OmpR, PhoB, orf27, PRK11083 (CreB)
1-3	1311709..1312467	two component transcriptional regulator, winged helix family	ATGAGTGCGGGGGACATCTCACCGCCGCAACATCGGAGACAAGACGCCGTGAACAAAGCGATTCGTATTCTCGTCGTCGACGACGACTCGCAGATTCGCAGCCTGTTGTGCGACTGCCTTGCAGACTTCGGCATGACGACCGCGCAAGCCGGCACCGGTGCGGAAATGCATCTCGCGCTCGGGGAGGGCGGCTTCGATCTCGTGGTGCTCGACCTGATGCTGCCGGACGACGACGGCCTCAATCTCTGCCGCGAGATTCGTGCGACCTCCGAGATTCCGTTGATCATCCTGACCGCGCGCGGCGAGATGACCGACCGGATCGTCGGACTGGAACTCGGCGCCGACGACTATATCGTCAAGCCGTTCGAACCGCGTGAACTGGTCGCGCGCATCCAGACG…	MSAGDISPPQHRRQDAVNKAIRILVVDDDSQIRSLLCDCLADFGMTTAQAGTGAEMHLALGEGGFDLVVLDLMLPDDDGLNLCREIRATSEIPLIILTARGEMTDRIVGLELGADDYIVKPFEPRELVARIQTILRRVRAQTQGRTRAQEESRFAGWRLHQIGRHLIAADNTVIPLSNAEFRLLNAFLAAPGRVLSREYLMDTARGKSIDTFDRSIDVQISRLRQKLREDIKEPRLIRTIRGEGYMLDVGHR	REC superfamily	wHTH (PF00486)	OmpR, PhoB, orf27
1-4	1406890..1407591	two component transcriptional regulator, winged helix family	ATGCCCAGCAACATTCTCGTCGTTGAAGATGAGCCCGCGATTTCCGAACTGATCTCGGTGAATCTCCAGCACGCCGGTCACTGCCCGATCCGCGCGTACAACGCCGAACAGGCTCAAAACCTGATCAGCGACGTGCTGCCCGATCTCGTGCTGCTCGACTGGATGCTGCCGGGCAAGTCCGGTATCGCGTTCGCGCGCGACCTGCGCAACAACGAACGGACCAAGCACATCCCGATCATCATGCTGACTGCCCGCGGCGACGAGCAGGACAAGGTGCTCGGCCTCGAAATCGGCGCGGACGACTACGTGACGAAGCCGTTTTCGCCGAAGGAGCTGATGGCGCGGATCAAGGCCGTGCTGCGCCGCCGCGCGCCGCAGCTGACCGAGGACGTCGTGGCG…	MPSNILVVEDEPAISELISVNLQHAGHCPIRAYNAEQAQNLISDVLPDLVLLDWMLPGKSGIAFARDLRNNERTKHIPIIMLTARGDEQDKVLGLEIGADDYVTKPFSPKELMARIKAVLRRRAPQLTEDVVAINGLRLDPATHRVAAHAEGSEIKLDLGPTEFRLLHFFMTHPERVHSRTQLLDQVWGDHVFVEERTVDVHIKRLRAALKPAGCDAMIETVRGSGYRLAKHA	REC superfamily	wHTH (PF00486)	PhoB, PRK10161 (PhoB), OmpR, orf27, PLN02819 (lysine-ketoglutarate reductase/saccharopine dehydrogenase)
1-5	complement(1460635..1461360)	two component transcriptional regulator, winged helix family	ATGAACGAAGATCCACTCAAATACCGTGTACTGCTGATCGAGGACGACGACCGCCTGGCGCAGCTCGTCCGCGAATACCTCGACGGCTATGAATTCGCGGTGACGGTCGTGCGCCGCGGCGACCTCGCCGTCGCGGCGGTGCGCGAGCACCAGCCGGCCCTCGTGATACTCGACCTGATGCTGCCGAACCTCGACGGGATGGAAGTCTGCCGGCGCATCCGCGCGTTCACCAACGTCCCCGTGCTGATCCTGACCGCGCGCCTGGACGTCTACGACCAGGTCGCGGGCCTCGAGACGGGCGCCGACGACTACGTGACGAAGCCGATCGAGCCGCGCGTGCTGGTCGCCCGCGCCCGTGCGCTGCTGCGCCGTGCGCAGCCGGCCGTCGCGGAAGCGCCC…	MNEDPLKYRVLLIEDDDRLAQLVREYLDGYEFAVTVVRRGDLAVAAVREHQPALVILDLMLPNLDGMEVCRRIRAFTNVPVLILTARLDVYDQVAGLETGADDYVTKPIEPRVLVARARALLRRAQPAVAEAPVATPEALVFGELAISPPNRTVTWRGEPVDLKTAEFNLLLILARAAGTVLSRDDILKQLRGIEFDGLDRSVDSGISKLRRRFEDASSEPHKIKTIWGRGYLFSPSAWDE	REC superfamily	wHTH (PF00486)	PRK10701(RstA), OmpR, orf27, PhoB,
1-6	1555167..1555871 (BiofilmReg)	two component transcriptional regulator, winged helix family	ATGAGAATTGCTGTACTGGATGACGATCCGGCCCAGACGGATTTCGTCAGTCAAACGCTGACGGCCGTTGGCCATACGTGCTATGCGTTCAAGGAAGGCAAGGCCCTGAAGAAGCGTCTGCAGCGCGAGACGTTCGATCTGCTGGTGCTTGACTGGAACGTACCTGACATGTCCGGCGAGGAAGTGTTGAAGTGGGTGCGTGCCAATCAGACCGAGCACAGCCTGCCGATCATCTTCATGACGAGCCGTGACGACGAGGCGGGGATCACGCAGATCCTCAACGCCGGCGCCGACGATTACGTGGTCAAGCCCGTGTCGGGCCCGATCCTGCGCGCGCGTATCGGCTCGCTGCTGCGTCGCGCGTATCCGGTCAACGCCGAGGCCACCGTTCGCGAATTC…	MRIAVLDDDPAQTDFVSQTLTAVGHTCYAFKEGKALKKRLQRETFDLLVLDWNVPDMSGEEVLKWVRANQTEHSLPIIFMTSRDDEAGITQILNAGADDYVVKPVSGPILRARIGSLLRRAYPVNAEATVREFDQFRFDVNLKQAYVGDKAVSLTQKEFELALLLFQHLDRPLSRAHILDLVWKQATDIPSRTMDTHISMLRTKLGLRPENGYRLAPIYGYGYRLERVGQGEPE	REC superfamily	wHTH (PF00486)	OmpR, PRK11083 (CreB), PhoB, orf27, PLN3029 (type a response regulator protein)
1-7	complement(1894573..1895238)	two component transcriptional regulator, winged helix family	ATGCATATCCTGCTGGTAGAAGACGATGTCATGCTGGCCGACGCCGTTTGCGCGGGCCTCAGGCAGAACGGCTGGCGCGCGGACTGGTCGGCCGACGTGCCGGCCGCGCGGCTCGCGCTCGTCGGCCACGGCTACGACGCGGTGCTGCTCGACCTGCAACTGCCGGGTGCGTCCGGTTTCACGCTGCTCGCCGCGATGCGTGCGAACTACGACCCGACGCCGGTATTGATCGTGACCGCACGCGATCAGTTGAGCGACCGGATCCGCGGCCTCGACGCAGGCGCCGACGACTATCTCGTGAAGCCGTTCCAGCTCGACGAACTCTACGCACGGTTGCGCGCGCTGACGCGCCGCAGCCAGGGCCGCGTGTCGGAACGCCTGATCTACCGCGACGTGCAC…	MHILLVEDDVMLADAVCAGLRQNGWRADWSADVPAARLALVGHGYDAVLLDLQLPGASGFTLLAAMRANYDPTPVLIVTARDQLSDRIRGLDAGADDYLVKPFQLDELYARLRALTRRSQGRVSERLIYRDVHVDPARKEVTRAGEPVALSIHEYRTLLALMERQGRVVTRTQLEERVYGNDSAIESNTIAVYIHQLRRKLGDELIVTVHGFGYRVGESPA	REC superfamily	wHTH (PF00486)	OmpR, PRK10336 (OseB), PhoB, orf27, PLN3029
1-8	2054117..2054782	two component transcriptional regulator, winged helix family	ATGCGAATACTGCTCGTCGAAGACGACCCGATGATCGGCGAGGCCGTCCATGCCGCGTTGAAGGACGCGTCGTACGCCACCGACTGGGTCACCGACGGCGTGCGCGCGTTGACCGCGTTCGCCGCGCAGCCTTACGACCTGGTCCTGCTCGACCTCGGCCTGCCCGGCCGCGACGGGCTCGACGTGCTGGCTGCCATCCGCGCGAAGGACGCCAGCGCGCCGCTGCTGATCGTCACCGCACGCGACGGGCTCGACGATCGCCTGGCCGGCCTCGACGGCGGCGCCGACGACTACATCGTGAAGCCGTTCGAGATGGCCGAGCTGCTCGCGCGGATTCGCGTCGCGATCCGGCGCCGGGCCGGTTCGGCTGCGCCGCTGCTGAGCAATGGCATCGTGTCG…	MRILLVEDDPMIGEAVHAALKDASYATDWVTDGVRALTAFAAQPYDLVLLDLGLPGRDGLDVLAAIRAKDASAPLLIVTARDGLDDRLAGLDGGADDYIVKPFEMAELLARIRVAIRRRAGSAAPLLSNGIVSLDPATREASVDGHAPVPLSNREFALLRALLVRPGAILSRRELEDRLYGWGEEVESNAVEFLIHSLRRKLGSTVIKNVRGAGWMVSRSG	REC superfamily	wHTH (PF00486)	OmpR, PRK10336 (OseB), cztR_siIR_copR (heavy metal response regulator), orf27
1-9	2302722..2303456	two component transcriptional regulator, winged helix family	ATGCCGATCATGGAAACGAAAAACCCCTCCAAGATTCTCGTCGTCGACGACGACCCGCGCCTGCGCGATCTGCTGCGCCGCTATCTCGGCGAGCAGGGTTTCAATGTCTACGTCGCCGAAAACGCGACCGCAATGAACAAGCTCTGGGTACGCGAGCGTTTCGACCTGCTCGTGCTCGACCTGATGCTTCCGGGCGAAGACGGCCTGTCGATCTGCCGCCGCCTGCGCGGCAGCAACGACCGCACGCCGATCATCATGCTCACCGCGAAGGGCGAGGATGTGGATCGCATCGTCGGCCTCGAGATGGGCGCCGACGATTACCTGCCGAAGCCGTTCAACCCGCGCGAGCTCGTCGCACGCATTCATGCGGTGCTGCGCCGCCAGGCGCCGGCCGAACTG…	MPIMETKNPSKILVVDDDPRLRDLLRRYLGEQGFNVYVAENATAMNKLWVRERFDLLVLDLMLPGEDGLSICRRLRGSNDRTPIIMLTAKGEDVDRIVGLEMGADDYLPKPFNPRELVARIHAVLRRQAPAELPGAPSETTEVFEFGEFSLNLATRTLTKSGQEIPLTTGEFSVLKVFARHPRQPLSREKLMELARGREYEVFDRSLDVQISRLRKLIEPDPGSPRFIQTVWGLGYVFIPDGAA	REC superfamily	wHTH (PF00486)	OmpR, PhoB, orf27
1-10	2518781..2519419	two component transcriptional regulator, LuxR family	ATGAATAGCCCTGTCACCACCACTCAGGAAACCGTCTTTGTCGTTGACGACGACGAGGCCGTACGGGACTCGCTGCGCTGGCTGCTGGAGGCGAACGGCTATCGCGTGCAATGCTTCTCGAGCGCCGAGCAGTTCCTCGATGCCTACCAGCCTGCACAGCAGGCCGGCCAGATCGCGTGCCTGATCCTCGACGTCCGGATGTCGGGCATGAGCGGCCTCGAACTGCAGGAGCGCCTGATTGCCGACAATGCCGCGCTGCCGATCATCTTCGTCACGGGTCACGGCGACGTGCCGATGGCCGTCTCGACGATGAAAAAGGGTGCGATGGACTTTATCGAGAAACCGTTCGACGAAGCCGAGCTGCGCAAGCTCGTCGAGCGGATGCTCGACAAGGCCCGA…	MNSPVTTTQETVFVVDDDEAVRDSLRWLLEANGYRVQCFSSAEQFLDAYQPAQQAGQIACLILDVRMSGMSGLELQERLIADNAALPIIFVTGHGDVPMAVSTMKKGAMDFIEKPFDEAELRKLVERMLDKARSESKSVQEQRAASERLSKLTAREQQVLERIIAGRLNKQIADDLGISIKTVEAHRANIMEKLNVNTVADLLRLALSKKQA	REC superfamily	LuxR_C_like, PF00196 (Bacterial regulatory proteins, luxR family)	FixY (response regulator), ntrC,orf27, PLN3029
1-11	2646083..2646919	two component transcriptional regulator, LuxR family	ATGCGGTTCCTGATGCTCAATTCAGACGCCGAGCGGCGTGACGGACTGAAGGCCCTGTTGCGACAGATCGACCGTCACGCCGGCATCAACGACGCGCCCGACAGTTTCCAGGCGCGCAGGCTGCTGCGTAACCAGCGCTTCGACCTCGTCGCGATCGACTGGCTCGACGTCGGCCGGCTCAGCGAGCTTCAGGCGATCTGCAACGCTTGCTCGCCGACACCCGTCGCCGTCCTGGTCGACGAAACATCGCCCGAAGCCATCCAGCGCTTCTTCAACTACGGTGTTGCCGGCGTGATCCCGCATTCCACGCGCCCACACCTGATCGTGCGTGCGCTCGAGATCGTGCTGCTGGGCGGGCACTACATCCCGCCGATCGCGCTCCGCCTGCTGCCCTCTACT…	MRFLMLNSDAERRDGLKALLRQIDRHAGINDAPDSFQARRLLRNQRFDLVAIDWLDVGRLSELQAICNACSPTPVAVLVDETSPEAIQRFFNYGVAGVIPHSTRPHLIVRALEIVLLGGHYIPPIALRLLPSTAAARYDAHFQTLAGSLPRRPPSGLLSPRQAQIMRFVHMGSTNKMIARTLGISEGTVKIHLASIFQQLGAANRAAAVAIYNGWLSPHLEVLLANRSRARKPPIGEHGPVPLRTQRNDRPYPLPASIDSAQDLPIAAEPPARFRRER	REC superfamily	LuxR_C_like, PF00196 (Bacterial regulatory proteins, luxR family)	CitB (response regulator NarL/FixJ family), PRK10651(trnscriptional regulator NarL), EspA (transcriptional regulator)
1-12	complement(2708647..2709345)	two component transcriptional regulator, winged helix family	ATGAGTGAACCCAGCCTGACCGTCGTCCTGATCGAGGACGAAAAGCAGATCCGCCGTTTCGTGCGCGCCGCGCTCGAGGAGGAGGACATCGCGGTGTTCGAGGCCGAGACGGGCAAGCAGGGGCTGATCGACGCGGCGACGCGCAAGCCCGATCTCGTGATCGTCGACCTCGGCCTGCCCGATACCGACGGCCTCGACGTGATCCGCGAGCTGCGCGGCTGGTCCGAGGTGCCGGTGATCGTGCTGTCCGCGCGCACGCAGGAAGAAGAGAAGGTCGCGGCGCTCGACGCGGGCGCCGACGATTACCTGACCAAGCCGTTCGGCGTGTCCGAACTGCGTGCGCGGATTCGCGCGCAACTGCGCCGGCGCAACCAGGGTGGCGCGAACGAGTCGCCGAAG…	MSEPSLTVVLIEDEKQIRRFVRAALEEEDIAVFEAETGKQGLIDAATRKPDLVIVDLGLPDTDGLDVIRELRGWSEVPVIVLSARTQEEEKVAALDAGADDYLTKPFGVSELRARIRAQLRRRNQGGANESPKVTFGTVIVDLALRQVWRDNEIVHLTPLEYRLLATLVRHAGRVLTHRQLLRDVWGPSHVESHHYLRIYMAHLRQKLERDPAQPEYIVTETGVGYRLVGAA	REC superfamily	wHTH (PF00486)	PRK10529 (transcriptional activator KdpE), ompR, orf27, PhoB, PLN3029
1-13	complement(2834033..2834875)	two component transcriptional regulator, winged helix family	GTGGGGCGGTGGCTGGGTTACCGCGCATTACAGTTCCCTTGCGCGGTAACTCGCAGTAACCCTTTCGTCCCTTTGTTTCGTTCTTTGACTCCGCCCTCGCGCGGTAAACTTCGAGCCATGACTACCCAGATCCTCATCGTCGACGACGACCAAGAACTCCGAGACCTGCTGCGCGACTACCTCGTGCGCCAGGGGATGGAAGTGTCCGTGCTGCACGACGCGGCGACGCTCGAGAAGCGCCTCGAGCGCGAGCGGCCCGACCTGATCGTGCTGGACCTGATGATGCCGGGCGTCGACGGCCTGACCGCGCTGCGCCAGTTGCGCGCGGCCGGCGACGACATCCCCGTGATCATGCTGACCGCCCGCGCGGACGACGTCGACCGCATCGTCGGGCTCGAG…	MGRWLGYRALQFPCAVTRSNPFVPLFRSLTPPSRGKLRAMTTQILIVDDDQELRDLLRDYLVRQGMEVSVLHDAATLEKRLERERPDLIVLDLMMPGVDGLTALRQLRAAGDDIPVIMLTARADDVDRIVGLELGADDYLGKPFNPRELLARVQAVLRRRRATPSAAAPEQREPFAFGRFVLDFQARTLSVDGKPATLSSSEFALLKIFVNHALRTLTRERLLELLHGPEYDGTDRGIDVQVWRLRRILETDPSTPRFIQTVRGRGYVFVPDGEAHAQTH	REC superfamily	wHTH (PF00486)	ompR, orf27, PhoB, Peripla_8P-6 (Periplasmic binding protein)
1-14	complement(3077380..3078054)	two component transcriptional regulator, winged helix family	ATGCCTGTCCCGATGCGGATTCTGCTTGTCGAAGATGATCGAATGATTGCCGAAGGCGTGCGCAAGGCGCTGCGCTCGGACGGCTTTGCGGTCGACTGGGTGCAGGACGGCGACGCCGCGCTGACGGCGCTCGGCGGCGAGACGTACGACCTGCTGCTGCTCGATCTCGGCCTGCCGAAGCGCGACGGCATCGACGTGCTGCGCACGCTGCGCGCACGCGGGCTGGCGCTGCCGGTGCTGATCGTCACTGCACGCGACGCGGTGGCCGATCGCGTGAAGGGGCTCGACGCGGGCGCCGACGACTACCTCGTCAAACCGTTCGACCTCGATGAACTCGGTGCACGGATGCGCGCACTGATCCGCCGCCAGGCCGGACGCAGCGAATCGCTGATCCGTCAC…	MPVPMRILLVEDDRMIAEGVRKALRSDGFAVDWVQDGDAALTALGGETYDLLLLDLGLPKRDGIDVLRTLRARGLALPVLIVTARDAVADRVKGLDAGADDYLVKPFDLDELGARMRALIRRQAGRSESLIRHGALTLDPASHQVTLDGVPVALSAREFALLEALLARPGAVLSKSQLEEKMYGWGEEIGSNTVEVYIHALRKKLGSDLIRNVRGLGYMVVKES	REC superfamily	wHTH (PF00486)	PRK10643 (BasR), ompR, PhoB, orf27
1-15	3110075..3110896	two component transcriptional regulator, winged helix family	TTGTGCAAGCCCGCAATGCAGGCTACGTTGTACACGAATAACTTCGGAGACAGCCGGCCGGCGCAAACGCCCTGCCGGCCATCGGTCAGCACCATGCGAATTCTCATCGCGGAAGACGACAGCATACTCGCGGACGGCCTCACCCGGTCACTCCGCCAATCGGGCTATGCAGTCGACCACGTGAAGACCGGTGTCGACGCCGATACCGCGTTGTCGATGCAGACATTCGACCTGCTGATCCTCGATCTCGGGCTCCCGAAAATGCCAGGGCTCGACGTGCTCAAGCGCCTGCGCGCCCGCAATTCCAACCTCCCCGTGCTGATCCTGACGGCCGCCGACAGCGTCGACGAGCGCGTGAAGGGGCTCGACCTCGGCGCCGACGACTACATGGCCAAGCCG…	MCKPAMQATLYTNNFGDSRPAQTPCRPSVSTMRILIAEDDSILADGLTRSLRQSGYAVDHVKTGVDADTALSMQTFDLLILDLGLPKMPGLDVLKRLRARNSNLPVLILTAADSVDERVKGLDLGADDYMAKPFALNELEARVRALTRRGAGGGPTVVRHGSLAFDQVGRIAYANDHVLDLSARELGLLEVLLQRIGRLVSKEQLVDHLCEWGEEVSNNAIEVYVHRLRKKIEPSGVRISTVRGLGYCLEKVAPAAPADTAAPQPAVAGTPLR	REC superfamily	wHTH (PF00486)	ompR, PRK15429 (transcriptional regulator TctD), cztR_siIR_copR (heavy metal response regulator), orf27, PLN3029
1-16	3571445..3572260	two component transcriptional regulator, LuxR family	ATGAGCCTGAACATCCTGCTCGTGGACGATCACGCGATCGTCCGGCAAGGGATCCGCCAGTTGCTGATCGACCGTGGCGTCGCACGCGACGTCACCGAGGCCGAGAACGGCGGCGACGCCGTGGCCGCCGTCGACAAGCAGGAATTCGACGTGATCCTGCTCGACATCTCGCTGCCGGACACGAACGGCATCGAAGTGCTCAAGCGCCTCAAGCGCAAGCTGCCGCGCACGCCGGTGCTGATGTTCTCGATGTACCGCGAGGATCAGTACGCGGTGCGCGCGCTGAAGGCCGGCGCCGCCGGCTATCTGTCGAAGACGGTCAACGCCGCGCAGATGATCGGCGCGATCCAGCAGGTCGCGGCCGGCCGCAAGTACGTGAGCCCCGCGATGGCCGAGGCG…	MSLNILLVDDHAIVRQGIRQLLIDRGVARDVTEAENGGDAVAAVDKQEFDVILLDISLPDTNGIEVLKRLKRKLPRTPVLMFSMYREDQYAVRALKAGAAGYLSKTVNAAQMIGAIQQVAAGRKYVSPAMAEALAEYVSFENEPLPHEKLSDREYQTLCMLASGKRLTDIANTLSLSVKTVSVYRSRLLEKMRLSNNAELTFYVMSNRLVDMAPTAGAGSSRPTHPVHPIPRRGACRAAARGRPPDAQALVLSDDFVTHRCAAAGLVRQIG	REC superfamily	LuxR_C_like, PF00196 (Bacterial regulatory proteins, luxR family)	CitB, PRK09483 (response regulator), PhoB, orf27
1-17	complement(3610040..3610582)	two component transcriptional regulator, Fis family			REC superfamily	HTH_8 (PF02954) (Bacterial regulatory protein Fis family)	COG4567, PRK11361 (acetoacetate metabolism regulatory protein AtoC), ntrC (nitrogen regulation protein NR(I)), orf27
1-18	complement(3638171..3638872)	two component transcriptional regulator, Fis family	ATGGCAACCATCCTGGTGGTAGATGATGAAATGGGCATCCGGGAATTGCTCTCGGAGATCCTCAGCGATGAAGGACATGTCGTCGAGGCGGCGGAGAACGCGCAGGCCGCGCGGGAATACCGGTTGAATCAGGCGCCCGATCTCGTGCTGCTCGATATCTGGATGCCCGATACCGACGGCGTGACGTTGCTCAAGGAGTGGGCGGCGCAAGGGCTGCTGACGATGCCCGTGATCATGATGTCCGGGCACGCGACGATCGATACGGCCGTCGAGGCGACGAAGATCGGCGCGCTCGATTTCCTCGAGAAGCCCATCGCGCTGCAGAAGCTGCTGAAGTCCGTCGAGCACGGTCTCGCACGCGGCGCGGCGCCGGTGTCCGCGAACGCGGCGGCGAAGGCC…	MATILVVDDEMGIRELLSEILSDEGHVVEAAENAQAAREYRLNQAPDLVLLDIWMPDTDGVTLLKEWAAQGLLTMPVIMMSGHATIDTAVEATKIGALDFLEKPIALQKLLKSVEHGLARGAAPVSANAAAKAGAGQAAGPAAVASAAALPTLGDDMASALGLAGQTAAIPFDIPLREARDAFERAYFEYHLARENGSMTRVAEKTGLERTHLYRKLKQLGVELGKKPSEGAI	REC superfamily	HTH_8 (PF02954) (Bacterial regulatory protein Fis family)	Rec:AtoC, fixJ, ntrC, orf27, PLN3029;DNA binding: AtoC, PRK05022 (anaerobic nitric oxide reductase transcription regulator), PEP_resp_reg
2-1	complement(28998..29642)	two component transcriptional regulator, LuxR family	ATGAGCGCCCCCGACACCGCCCGGCCCGTCGCCCGACTGCTGCTCGTCGACGATCACCCGCTCGTGCGCGACGGCCTGCGGATGCGGCTCGAAGCGGCCGACCTGTCCGTGGTCGGCGAAGCCGGCAACGCCGACGAGGCGCTCGCGCTCGCCGCGTCGCTCGAACCCGATCTCGCGCTGATGGACGTCGGCATGAACGGGATGAACGGCATCACGCTCGCGGGCGTATTCCACGAGCGCTTTCCGGGCATCCGCGTGCTGATGCTGTCGATGCACGACAACGTCGAATACGTGACGCAGGCCGTGCGTGCCGGCGCGAGCGGCTACCTGCTGAAGGATTCGCCCGCGAGCGAGATCGTGCGCGCGATCGGCGCGGTGCTGGCCGGCCAGACGTTCTTC…	MSAPDTARPVARLLLVDDHPLVRDGLRMRLEAADLSVVGEAGNADEALALAASLEPDLALMDVGMNGMNGITLAGVFHERFPGIRVLMLSMHDNVEYVTQAVRAGASGYLLKDSPASEIVRAIGAVLAGQTFFSEGLAARMIHASATASPLDRLTPRERDILDALAEGLSSKQIAQQTGLSVRTVETHRLNLKRKLEIEGQAELIKFAVEHRRR	REC superfamily	LuxR_C_like, PF00196 (Bacterial regulatory proteins, luxR family)	CitB (DNA-binding response regulator, NarL/FixJ family, contains REC and HTH domain), PRK15369 (two component system sensor kinase SsrB), ntrC (nitrogen regulation protein NR(I); This model represents NtrC), orf27
2-2	438804..439544	two component transcriptional regulator, winged helix family	ATGGACAAGATCGACCACGTGCTGATCGTCGACGACGATCGCGCGATCCGCGAACTGATCGCGGATTATCTGGAGAAGAACGGCATGCGCGTGTCGTTGGCCGCGAACGGCCGCGAGATGCGCAACGTGCTGGACGACGGCGCGCCCGACCTGATCGTGCTGGACCTGATGATGCCCGGCGAGGACGGCCTCACGCTGTGCCGCGACCTGCGCGCGGGCAAGTTCCGCACGGTGCCCGTGCTGATGCTGACCGCACGCGGCGAGGAAACCGATCGCATCATCGGCCTCGAGATGGGCGCCGACGACTACCTGGCCAAGCCGTTCGCAGTGCGCGAGCTGCTCGCGCGGATCCGCTCGGTGCTGCGGCGCGCGCGCATGCTGCCGCCCGGCATGCAGGTG…	MDKIDHVLIVDDDRAIRELIADYLEKNGMRVSLAANGREMRNVLDDGAPDLIVLDLMMPGEDGLTLCRDLRAGKFRTVPVLMLTARGEETDRIIGLEMGADDYLAKPFAVRELLARIRSVLRRARMLPPGMQVTETAELLAFGEWRLDTTGRHLLDAEGTLVALSGAEYRLLRVFLDNPQRVLTRDQLLNLTQGRQSDPFDRSIDLLVSRLRQRLRDGAREPRYIKTLRNEGYVFSSAVTAVDGTL	REC superfamily	HTH superfamily, wHTH (PF00486)	ompR, PRK09468 (osmolarity response regulator), PhoB, orf27, PLN03029 (type-a response regulator protein)
2-3	503894..504592	two component transcriptional regulator, winged helix family	ATGAGCAAACCGACCGTCGTCATCGTGATCGTCGACGAAGACAGGTTCATCCGGCATTTCGTCCGTGTCGCGCTGAAGGCCGAACGCATGCACGTCTGCGAGGCCGCGACCGGTGCGGCGGGCGTGGCGGCCGTCGGCGCACGACGGCCCGACCTGATCGTCGCGGACACGAACCTGCACGACATTGGCGGCACCGAACTGATTCGTGCGCTGCGCGCGTGCTCGGCTGCGCCGCTGATCGTGCTGTCGGCGCTGAGCGCGGAAAGCGACAAGGTGGCCGCGCTCGACGCGGGCGCAGACGACTACCTGACCAAGCCGTTCGGCGCCGCCGAGCTGATCGCGCGGATTCGTGCGCACCTGCGGCGGCAAGCCGGCGGCGGGCGCATCGATGCGGTACGT…	MSKPTVVIVIVDEDRFIRHFVRVALKAERMHVCEAATGAAGVAAVGARRPDLIVADTNLHDIGGTELIRALRACSAAPLIVLSALSAESDKVAALDAGADDYLTKPFGAAELIARIRAHLRRQAGGGRIDAVRVCFGDVTVDLADRQVLRGGARVHLSPIEFRLLAALAHHAGRLLTHDRLLSEVWGATHGKDAHYLRVYVGHLRRKLERDPRRPAYILTETGVGYRLAGAR	REC superfamily	HTH superfamily, wHTH (PF00486)	PRK10529 (DNA-binding transcriptional activator KdpE), ompR, PhoB, orf27
2-4	848996..849706	two component transcriptional regulator, winged helix family	ATGTCTTTTCGCATCCTGCTCGTCGAAGACGACACCCGCCTGTCCACGCTGATCGCCGGCTACCTGCGCAAGAACGACTATGAAGTCGACACTGTGCTGCATGGTGACGCCGCGGTGCCGGCGATCCTGTCCATTCGTCCCGATCTCGTCATTCTCGACGTGAACCTGCCGGGCAAGGACGGCTTCGAAATCTGCCGCGAGGCACGCAAGCAGTACGACGGCGTGATCATCATGGTGACGGCCCGTGACGAGCCGTTCGACGAACTGCTCGGCCTCGAGTTCGGCGCGGACGACTACGTGCACAAGCCGGTCGAGCCGCGCATCCTGCTCGCGCGGATCAAGGCCCAACTGCGCCGCGCGCCCGCGCGCGCGGTCGAGAGCACCGCGCCGCAGCCGGAG…	MSFRILLVEDDTRLSTLIAGYLRKNDYEVDTVLHGDAAVPAILSIRPDLVILDVNLPGKDGFEICREARKQYDGVIIMVTARDEPFDELLGLEFGADDYVHKPVEPRILLARIKAQLRRAPARAVESTAPQPERYAFGKFSIDRTDRSVVLPDGSTPDLTSAEFDLLWALVCHAGEVVSRDDLMLQLRGVEFDGLDRTIDGRISKLRRKLRDDASNPQRIKTIRSKGYQFSKHAWE	REC superfamily	HTH superfamily, wHTH (PF00486)	PRK10701 (DNA-binding transcriptional regulator RstA), ompR, orf27, PhoB, PLN03029 (type-a response regulator protein)
2-5	complement(873699..874361)	two component transcriptional regulator, winged helix family	ATGCGCGTATTGCTCGTCGAGGACGATCCGCTGATCGGCAGCGGGCTCGAACAGGGCCTCAAACAGGAAGGCTTCGCGGTCGACTGGGTGAAGGACGGCGACGCCGCGTCCCTCGCGCTGCGCGCGACCGGCTACGGCCTGCTGCTGCTCGATCTCGGGCTGCCGAACCGCGACGGCCTGTCGGTGCTCGCCGCGCTGCGCCGCCGCGACGAGAACCTCCCCGCGATCATCATCACCGCGCGCGACGGCGTGCCCGACCGCATCGCGGGCCTCGACAGCGGCGCGGACGACTATCTCGTCAAGCCGTTCGAGCTCGACGAGCTGCTCGCCCGCATCCGCGCCGTGAACCGCCGCCATGCGGGCCGCGCGCAGACGACGCTCGTGATCGGCCCGCTGCGG…	MRVLLVEDDPLIGSGLEQGLKQEGFAVDWVKDGDAASLALRATGYGLLLLDLGLPNRDGLSVLAALRRRDENLPAIIITARDGVPDRIAGLDSGADDYLVKPFELDELLARIRAVNRRHAGRAQTTLVIGPLRLDPVKHLVWLNDDEVPLSPKEFVLLHELMRDPGAVISREQFEERLYSWGEEIESNAVQVHIHNLRKKLGHDMIRTVRGVGYRIGDGA	REC superfamily	HTH superfamily, wHTH (PF00486)	PRK10643 (DNA-binding transcriptional regulator BasR), ompR, PhoB, orf27
2-6	988870..989568	two component transcriptional regulator, LuxR family	ATGAACCACCTGGAACTGCGCATGAGGAAATTCAATGTTCGCGTCGCTTTCGCGTACGACTGGCCGTTGACGCTGGCCGGCATCGAGCAGGTCGCGGGCAGCGGCTGTGCGATCGAGATCGTCGCGGTCTACCGGAGCGTGGCCGAACTGGTCGCGTCGCTCGGCGGTGTCGACTGCGATGTCGTGCTGGTCGACTATGCGATCCGCGGAGACGAGCAGATGGACGGCCTTGCGCTGTTCGACTGGCTGCGCCGCACGCGTCCGAACGTCGGGATCGTCGCGCTGGTCGCGAACGAGAACCCGCTGATCTTCGGGTCGATCCTCGCGATCGGCGGCGTGAGCATCGTCAGCAAGTTCGACGAGGTCGGCCATATCGTCACGGCCATTCATTCGAGCTAC…	MNHLELRMRKFNVRVAFAYDWPLTLAGIEQVAGSGCAIEIVAVYRSVAELVASLGGVDCDVVLVDYAIRGDEQMDGLALFDWLRRTRPNVGIVALVANENPLIFGSILAIGGVSIVSKFDEVGHIVTAIHSSYSGGRYLSPLVRRAVDAFGERGEAPVKLSAREIEVIRLYLSGVPIKTIAQRLSKGKQTVSAQKISAMKKLGVSNDVELIQRAAGLGLGTGLAVSRPGRAA	REC superfamily	LuxR_C_like, PF00196 (Bacterial regulatory proteins, luxR family)	CitB (DNA-binding response regulator, NarL/FixJ family, contains REC and HTH domain), PRK10840 (transcriptional regulator RcsB)
2-7	complement(1018258..1019445)	two component transcriptional regulator, winged helix family	GTGGGTGCCGGCGCACTGGGCGTAACCCGGCGCCGCGGCGTTCCGCTTCGTTTCGTTTCGTTTTCCATCCGTTTCATCAACCACCCGGCCGGCGCAGACCGTCGGCCACGCAAGGAGAAACCCCATGAAGTCCATCAAGAAGATGATTGCCGTCGTCGTTTTGTGTATCGTCTCAGCAGCAGCGTCGGCCCAGCAGGTGCCGCCCGGCACGGCGAACGGCGGTGCACGCGTCGAACGCGCGCTGATGCAATTGCAGACCCGCTTCGCCAGCGCGAACACGACGCACGACGGCAAGCTCACCCGCGAGCAGGCCGCCGCGGGCATGCCGATGGTCGCGCAGCATTTCGACGAAATCGACACGCAGCACAACGGCTACGTCACGCTCGAGCAGCTCGCCGG…	MGAGALGVTRRRGVPLRFVSFSIRFINHPAGADRRPRKEKPHEVHQEDDCRRRFVYRLSSSVGPAGAARHGERRCTRRTRADAIADPLRQREHDARRQAHPRAGRRGHADGRAAFRRNRHAAQRLRHARAARRFHAPAHGGPLNPHDNPAAHGTGRQAMEQSCRIVVLDDEAELRNMLQRFLTGHGFQVRAVADGKRLDRLLQREPYDLLVLDLMMEPEDGLSVCRRLRAEGQTLPILMLTAKGDAADKVVGLETGADDYLAKPFLPDELVARVRALLRRQKMAAGEPTVTSQRLRFGAFTFDVGQQTLMRDGTPVEIHSAQMLLLHALGSSPNRAVSRENLLARARGRDHAALDRSVDVQILRLRQIVEDDPGKPRFIKTVWGIGYMLVAGVDS	REC superfamily	HTH superfamily, wHTH (PF00486)	ompR, PRK09468 (osmolarity response regulator), orf27, PhoB
2-8	1023597..1024343	two component transcriptional regulator, winged helix family	ATGTCGCACCGGATTGCGCGAGCCCAGCCTGAGACCATGCATCAACCCAATATCCTGATCGTCGAAGATGAAGTGGCGATCGCGGACACGATCATCTACGCCCTCGGCACCGACGGCATGCAGACCGTCCACTGCACGCTCGGGCAGGCGGCGCTCGATCATCTGCGCGACACGCGCTTCGATCTCGTGGCGCTCGACGTCGGCCTGCCGGATCTCAGCGGCTTCGAAGTGTGCCGGCGGCTGCGCACGTTCTCCGACGTGCCGGTGATCTTCCTCACTGCGCGGCACGATGAAATCGACCGGATCGTCGGGCTCGAAATCGGCGCCGACGATTACGTGATCAAGCCGTTTTCGCCGCGCGAGCTGGCGGCGCGGGTGCGCGTGATCCTGCGGCGTTTC…	MSHRIARAQPETMHQPNILIVEDEVAIADTIIYALGTDGMQTVHCTLGQAALDHLRDTRFDLVALDVGLPDLSGFEVCRRLRTFSDVPVIFLTARHDEIDRIVGLEIGADDYVIKPFSPRELAARVRVILRRFYRTAAPESPLAPAPAPAATIAPGFTLDTDGARVSWLGHALDLTRYEFGLLALLVRHPGRIYSREQLMDLVWHEAFDSADRTVDTHIKTLRAKLRAIDPERDPIRTHRGMGYSLQP	REC superfamily	HTH superfamily, wHTH (PF00486)	PRK11083 (DNA-binding response regulator CreB), ompR, PhoB, orf27
2-9	complement(1770703..1771362)	two component transcriptional regulator, winged helix family	ATGGCCAAAGTGCTGTTGCTCGACGACGAGGTCGAGTTGCGCGAGGAAATCGCCGCGTTCCTGGAAAAACGCGGCTGGACGGTCGATCAGGCCGGCACGGTCGCGGAGTTCCAGGAACGCGCGTCGGATCTCGCATTTGCGATCATCGACGTGATGCTGCCGGACGGGAGCGGCTTCGATGCGGCCGTGTGGCTCAGGGCCCGGCATCGCGACTGCGGCATCGTCATGCTGACCGCCCGCGGTGACACACAGGACAAGATCGACGGCCTGATCGGCGGCGCCGATCACTATCTCGTCAAGCCGGTGAAACTGCTCGAACTCGACGCCATTCTCCAGGCGCTCGGCCGCCGGGTGGCAAACGACTGGCGGCTCGACTGTCAGGCGCGCGTGCTGTCCGCG…	MAKVLLLDDEVELREEIAAFLEKRGWTVDQAGTVAEFQERASDLAFAIIDVMLPDGSGFDAAVWLRARHRDCGIVMLTARGDTQDKIDGLIGGADHYLVKPVKLLELDAILQALGRRVANDWRLDCQARVLSAPVGGRLELSASEIALLALLARHPSKAVSRRQIAEDFGFDWVDYDERRLETMVSRLRQRWRSEAGSELPLKTVHRTGYTFAAPLMLA	REC superfamily	HTH superfamily, wHTH (PF00486)	ompR, PhoB, orf27, PRK11083 (DNA-binding response regulator CreB)
2-10	1834369..1835016	two component transcriptional regulator, LuxR family	ATGACCACCATCCTGATTGCGGATGACCACGCAGTCGTGCGCGAAGGCATCCGCGGGCTGTTGCGGCTCGATGCGTCGTTCGAGATCGTCGCGGAAACCGACGACGGAACCTCGACGGTCGAGCAAGTGCGGGCGCATCGTCCCGACGTGCTGCTGCTCGACCTGATGATGCCCGGCATGGGTCAAGCGGGCGTGCCCGCCGCCATTCGCGCGATCCGGGCAGCCAGCGCCGACACGCACATCATGGTGCTGACGTCGTCGGACGACGATGCGCTCGCCCTCGCCGCGATCGACGCCGGCGCCGATTCGTTCCTGCTGAAATCGATGCGCGGCGAGCGTCTGCTGCAGGCGATCCATGCGGCCGTCCACGGCGAACCGACGCTGCACCCCGGCATCGCG…	MTTILIADDHAVVREGIRGLLRLDASFEIVAETDDGTSTVEQVRAHRPDVLLLDLMMPGMGQAGVPAAIRAIRAASADTHIMVLTSSDDDALALAAIDAGADSFLLKSMRGERLLQAIHAAVHGEPTLHPGIAQRMIGALRKPPLSPFAALTARELEVLRCLAEGGSNARIAATLGITEKTVKTHLGNVMSKLHLSDRTQAVALAWREGLMAPKA	REC superfamily	LuxR_C_like, PF00196 (Bacterial regulatory proteins, luxR family)	CitB (DNA-binding response regulator, NarL/FixJ family, contains REC and HTH domain), PRK10651 (transcriptional regulator NarL, orf27, epsA (transcriptional regulator EpsA)
3-1	83872..84555	two component transcriptional regulator, winged helix family	ATGAGAATTGCGATACTCGGGCCTGATCCTGTCGCGCGTGGTTTTGCGAAGGAGGCGCTAGTGAGAGTTGGTCACGTATGTCAAACGTTTTCATCGGGGAACGAGATAATTCGTCAACTCCGTCGTGAAACGTACGATCTTCTGATACTCGATTGGTTGGTGACCGATATTTCGGGTGAAGAGGTCATGCTATGGGCGCATAAAAATCTACCTGGACGTGTACCCGTTATATTTTTGAGTAAGCGCGGACGTGACGAAGATCTCGTTCGGATTCTTGCTGCTGGAGCAGATGGGTATTTGGTTAAGCCGATATCCGGTGATGTTTTGGCGGCATACGTCAATGCTCTCGCGCGATCCATTGCGGGAGTTGATTTGAAAGGCAGGCTAAGCGTTAGGGAG…	MRIAILGPDPVARGFAKEALVRVGHVCQTFSSGNEIIRQLRRETYDLLILDWLVTDISGEEVMLWAHKNLPGRVPVIFLSKRGRDEDLVRILAAGADGYLVKPISGDVLAAYVNALARSIAGVDLKGRLSVREFEFDLRRKILLANGACVETTPKEFDIALLFFRNLGNSVSRGHLLDIVWRQHPVSVSRTVDTHISNVRTKLNLNPENGYVFKPIYGFGYILDLVR	REC superfamily	HTH superfamily, wHTH (PF00486)	OmpR, PhoB, orf27, PRK11083 (DNA binding response regulator CreB)
3-2	304911..305600	two component transcriptional regulator, winged helix family	ATGCACTCGCTCATACTCATCGCGGATGACGCACCGGAAATGGCGTCAACGCTCGATACCTGCCTGACTCGCAACGGGTTTCGAACCTTTCAGACCAACACCTCCCAGGCCGTGCTTGCCACGCAACTGAACCTGAAGCCGGATCTGGTCATTCTCGACGTCCGTGAACTGTGTGCGGATACCCTGGACATGCTGGCCAGGCTTCGACGACAAAGCGATACCCCCATCGTCGTCATGTCGGCGTGTGATCTGGACGGGGAGCGGCTGCGTGCACTGCACGCCGGCGCTGACGACTACATCGTCAGGCCGTTCAACCCGGATGTAGTCGTCGCGCGATTGCTCACGATGCTTCGCCGCTCTGGTGCGCTCGCGCCTGAACGCCGTCTCCGGGTTGGCGCG…	MHSLILIADDAPEMASTLDTCLTRNGFRTFQTNTSQAVLATQLNLKPDLVILDVRELCADTLDMLARLRRQSDTPIVVMSACDLDGERLRALHAGADDYIVRPFNPDVVVARLLTMLRRSGALAPERRLRVGALEVDTESYRVGVRTSSGEAPVSVTLVEFRLLAHMARLPNRAFTRIELLNACMTDVSTSTRTVDSHMTRLRKKLVAAGASGILECVHGVGYRLQKAG	REC superfamily	HTH superfamily, wHTH (PF00486)	OmpR, PhoB, PRK10161 ( transcriptional regulator Pho), orf27
3-3	341545..342378	two component transcriptional regulator, winged helix family	ATGGCGGCAGCGCGGCCCGTTGCCGCGATTCGCCCCCGCGCATCCGGCCAGCCGGACCGGGGCCGGCCCGAACCGATACCCGACTTCGGCACTGACGTGCCGCCGCCTGCCGCCATGGACCAACCGAAACGCATCCTGATCGTCGAGGACGACGCCGACATCGCCGACGTGCTGAGCCTGCACCTGCGCGACGAGCGCTACGAGGTCGTGCACAGCGCGGACGGCGCGGAAGGGCTGCGCCTGCTCGAGCAGGGCGGCTGGGATGCGCTGATCCTCGACCTGATGCTGCCGGGCGTCGACGGTCTCGAGATCTGCCGGCGTGCGCGCGCGATGACGCGCTACACGCCGATCATCATCACGAGCGCGCGCTCGAGCGAAGTGCACCGGATCCTCGGCCTC…	MAAARPVAAIRPRASGQPDRGRPEPIPDFGTDVPPPAAMDQPKRILIVEDDADIADVLSLHLRDERYEVVHSADGAEGLRLLEQGGWDALILDLMLPGVDGLEICRRARAMTRYTPIIITSARSSEVHRILGLELGADDYLAKPFSVLELVARVKALLRRVDALARDSRIDAGTLDVAGLAIDPIAREASVDGARIDLTPREFDLLYFFARHPGKVFSRMDLLNAVWGYQHEGYEHTVNTHINRLRAKIEADPAEPVRILTVWGRGYKLAAPGQRDA	REC superfamily	HTH superfamily, wHTH (PF00486)	OmpR, PhoB, orf27, PRK11083 (DNA binding response regulator CreB)
3-4	complement(355358..356047)	two component transcriptional regulator, winged helix family	ATGAACCCTCTGATACTCATTGCCGAAGACGATCCGGAGATCGCCGAAATACTCGACGCCTACCTCGCCCACGACGGCTTTCGCACCTATCGCGTCGGTCACGGCCAGGCCGTGCTCGACGTGCAGCCCGTGCTGAAGCCCGATCTGATCCTGCTCGACGTCAGGATGCCGCAGAAGGACGGCTGGGAGGTCCTGGTCGAACTGCGTCGCCGCGTCGACACGCCGATCGTCATCATCACGGCGCTCGACCGCGAGATCGATCGCTTGCAGGGGCTGCGTTTTGGCGCGGACGACTACATCACGAAGCCGTTCAATCCGGCCGAAGTGGTCGCGCGCATCCGCGCGATCCTGCGTCGTCTCGAAACGGCCTCGTCCGGGCGCTTCATCAAGGTCGGCAAC…	MNPLILIAEDDPEIAEILDAYLAHDGFRTYRVGHGQAVLDVQPVLKPDLILLDVRMPQKDGWEVLVELRRRVDTPIVIITALDREIDRLQGLRFGADDYITKPFNPAEVVARIRAILRRLETASSGRFIKVGNLEIDTQSYLTTVRTDSGETGVSLTLTEFRLLAHLAGSPNRVFTRSELIDACLADVDALERTVDSHISRLRKKLECAGASGTPEVMRGVGYRLRSTQ	REC superfamily	HTH superfamily, wHTH (PF00486)	OmpR, PhoB, orf27, PRK11083 (DNA binding response regulator CreB)
3-5	complement(621131..621841)	two component transcriptional regulator, winged helix family	ATGCCCATCCGAATCCTGCTCGTCGAAGACGACGCCCAACTGTCCGCGCTGATCGCAGACTATCTGCGCATGCATCAGTACGAGGTGGACACGCTGCTTGACGGCACCGATGCCGTAGCCACGATCGTCGCGCGTCATCCCGACCTGGTGCTTCTCGACATCAACCTGCCGGGCAAGGACGGCTTCGAGATTTGCCGCGAGGCACGCATGCGGTACGACGGCATCGTCATCATGATGACGGGCCGCGACGAACTGTTCGACGAGTTGCTCGGCCTGGAATTCGGCGCAGACGATTTTCTCCACAAGCCGGTCGAGCCGCGCATTCTGCTCGCGCGAATCAAGGCTCACCTGCGACGGATGCGCATGCGCCCGGGCGACGTCGAACCCGTATCGCCACTT…	MPIRILLVEDDAQLSALIADYLRMHQYEVDTLLDGTDAVATIVARHPDLVLLDINLPGKDGFEICREARMRYDGIVIMMTGRDELFDELLGLEFGADDFLHKPVEPRILLARIKAHLRRMRMRPGDVEPVSPLRFQFGKFSIDRADRKVHLPDGSAPRLTSTEFDLLWALVCRAGEVVSREDLTQLLRGIEFDGFDRSIDGRISKLRRKLHDDVTEPKRIKTIRCKGYQFSKHAWD	REC superfamily	HTH superfamily, wHTH (PF00486)	PRK10701 (DNA binding trascriptional regulator RstA), OmpR, orf27, PhoB
3-6	673757..674470	two component transcriptional regulator, winged helix family	ATGGACCACATCCTTGTCATCGACGACGATCCGAACATTCGTACGCTGCTCGGCGACTACCTGCGCGCGATGAACTACCGCGTCACGCTGGCCGAGAACGGCTTGCAGCTTCGGCAGGCGCTCGGGACGTCGACCGTCGATCTCGTCGTGCTCGACCTGATGCTCGACGGCGAGGACGGTCTCGACCTCACGCGCGACCTGCGGCAGCGCCACGACGTGCCGATCGTGATCCTGAGCGCGCGCGGCGGCCTGCTCGACCGGATCCTCGGCCTCGAGATGGGCGCGGACGACTACCTGCCGAAGCCGTTCGATCCGCGCGAGCTCGTCGCGAAGATCAAGGTCGTGCTGCGCCGCACGCGTGCGATTCCGGGCACGCGGCGCACGGAAGCCTCGTCGCGT…	MDHILVIDDDPNIRTLLGDYLRAMNYRVTLAENGLQLRQALGTSTVDLVVLDLMLDGEDGLDLTRDLRQRHDVPIVILSARGGLLDRILGLEMGADDYLPKPFDPRELVAKIKVVLRRTRAIPGTRRTEASSRVSFAGWHLDTRMKQMMSPDGVVVSLGGSDYRTLRALLDHPNRPLSREFLLDRVFGKELAPLDRSIDVCVSRLRHHLKDAARNAALIRTVRNEGYMLVADVVHDA	REC superfamily	HTH superfamily, wHTH (PF00486)	OmpR, PhoB, orf27, PLN03029 ( type a response regulator protein)
3-7	756289..757095	two component transcriptional regulator, AraC family	ATGCATCCATCGATCTCCGCATTGGGCGACGCCCATATCCTGATCGTCGACGATCAGCCCGACCAGCTTCGCTTGCTGATCGACATCCTGCGCGGCACGGGCTGCCGGATCAGCATTGCATCCGACGGGCTGCAAGCGTGCCAGCGCGCGCAGGCGCTCACGCCCGACCTGATCCTGATGGATGTCCGCATGCCGCGCATGGACGGCTTCACCGCGTGCCGGCTGCTTGCCGCCGATCCGCTGACGTGTGCGATTCCGGTGATCTTCCTGACCGTGGCCGGCGCCTTGCACGAACGCCTCGAGGGATTCGAAATCGGCTGCGTCGACTATGTGGTGAAGCCGTTCGAGCCCGCCGAAGTGCTCGCGCGGATTCGCGTGCAGATCGCGCGGGAGAAGCGC…	MHPSISALGDAHILIVDDQPDQLRLLIDILRGTGCRISIASDGLQACQRAQALTPDLILMDVRMPRMDGFTACRLLAADPLTCAIPVIFLTVAGALHERLEGFEIGCVDYVVKPFEPAEVLARIRVQIAREKRERPVDMESPFVAGKDDDIIVRAAIRHLARTLNDPPTVEQLARAVGTHEKRLSRAFRDNLGQTVFEYLRHERLRIAQDLLDSTSLSIASIAKEIGFSTPANFATAFRERFGLTPTEWRRQRHAGERTARREPQRDA	REC superfamily	HTH-AraC (PF00165) (Bacterial regulatory helix-turn-helix proteins, AraC family;)	orf27, AraC, COG4567 (Two-component response regulator, ActR/RegA family, consists of REC and Fis-type HTH domains), PF12833 ( HTH_18), PRK11083, PhoB, ftrA (transcriptional activator FtrA), adjacent_YSIRK (YSIRK-targeted surface antigen transcriptional regulator)
3-8	987989..988825	two component transcriptional regulator, AraC family	ATGTCATCCCGCTCGTCCAGTTCGGCGTCGCCTCGTCCCACGCCTGATCTTGCTGACGCACATATTCTTGTCGTCGACGATCGCCCGAACGACCTGCGGCTCCTGACCGAAATCCTGCGCGCCGCACGGTGCCGGATCAGCGTCGCGTTCGACGGGCTGCAGGCCTATCACCGTGCCCAGGCGATCGCGCCCGACCTGATCCTGATGGATGTCCGCATGCCGCGCATGGACGGCTTCGCCGCGTGCCGCCTGCTGGCGTCGACGCCTTCGACGCAATCGATCCCGGTCATCATCCTGACGGCCGCGGGCGATCTCGAGGATCGCATCGCCGGGCTCGAAACGGGTGCGATCGACTACATCATCAAGCCGTTCGAGCCGACCGAAGTGCTGGCCCGGATC…	MSSRSSSSASPRPTPDLADAHILVVDDRPNDLRLLTEILRAARCRISVAFDGLQAYHRAQAIAPDLILMDVRMPRMDGFAACRLLASTPSTQSIPVIILTAAGDLEDRIAGLETGAIDYIIKPFEPTEVLARIRNHLKRARRSQPFAHLPELPDNPDAALVRAASEVLLRDLRHPPALEELARQVGTHEKRLSRVFRDHLGQTVFEYLRDTRLRAAMHFLAETSMGIGDIAEEIGFSTPGNFATAFRERFGITPSDWRRQRHAVNAPPATPGEHHHDV	REC superfamily	HTH-AraC (PF00165) (Bacterial regulatory helix-turn-helix proteins, AraC family;)	orf27, AraC, COG4567 (Two-component response regulator, ActR/RegA family, consists of REC and Fis-type HTH domains), PhoB, pleD (response regulator PleD), PF12833 ( HTH_18), PRK10572 (DNA-binding transcriptional regulator AraC),PLN03029 (type-a response regulator protein), adjacent_YSIRK (YSIRK-targeted surface antigen transcriptional regulator)
3-9	1311787..1312416	two component transcriptional regulator, LuxR family	ATGAAAATCCTGATCGTCGACGATCACGCCATCCTGCGCGACGGCGTGGAGATGCTGTTGCGCCAGGGTGATGGCGACATGGTCGTCGTCCAGGCAAGCAGCGCCGATGACGCGGTGCGGCTGCTCGACGCGCACGCCGACCTCGACGCGATCGTGCTCGACCTGAAGCTGCAGGGCATGGACGGCCTCGACGCGCTCGCCGTGTTCGCGACGATGCGCCCCGGGCTCCCGGTCATCGTGCTGTCGTCGTCCGAGGATCCCGGCGCCGTGCGTAGTGCGTTCGCGCAGGGTGCGATGGGTTACGTGCCGAAATCCGCCAGCCCGCGCACGCTGCTGTCCGCCATCCGGATCGCACTCAACGGCGAACGCTACGTTCCGCCGCTCGTGCTCGACGACCCC…	MKILIVDDHAILRDGVEMLLRQGDGDMVVVQASSADDAVRLLDAHADLDAIVLDLKLQGMDGLDALAVFATMRPGLPVIVLSSSEDPGAVRSAFAQGAMGYVPKSASPRTLLSAIRIALNGERYVPPLVLDDPALQHPDGAAAARGSMLTQRQIEVLRYLAEGVPNKVIADKLGLSEKTIKAHITAIFKALNVINRTQAAAAGRKAGLI	REC superfamily	LuxR_C_like, PF00196 (Bacterial regulatory proteins, luxR family)	CitB (DNA-binding response regulator, NarL/FixJ family, contains REC and HTH domain), PRK10651 (transcriptional regulator NarL), ntrC (nitrogen regulation protein NR(I); This model represents NtrC), orf27

## Sheet: S2 Table
Diversity of two component transcriptional regulators' domains
DNA binding	amount	Multi	amount	%
HTH superfamily, wHTH (PF00486)	26			70.2703
		PRK11083 (DNA-binding response regulator CreB)	7
		PRK09468 (osmolarity response regulator)	6
		PRK10643 (BasR)	3
		PRK10701 (DNA-binding transcriptional regulator RstA)	3
		PRK10161 (PhoB)	2
		PRK10336 (OseB)	2
		PRK10529 (transcriptional activator KdpE)	2
		PRK15429 (transcriptional regulator TctD)	1
LuxR_C_like, PF00196 (Bacterial regulatory proteins, luxR family)	7			18.9189
		FixY	1
		CitB	6
HTH_8 (PF02954) (Bacterial regulatory protein Fis family)	2			5.40541
HTH-AraC (PF00165) (Bacterial regulatory helix-turn-helix proteins, AraC family;)	2			5.40541
